# Supplementary material for: Water environmental stress, rebound effect, and economic growth of China’s textile industry
Source: PeerJ. 2018 Jun 29;6:e5112. doi: 10.7717/peerj.5112 (PMC6056267; doi:10.7717/peerj.5112)
Supplement: Supplemental Information 1 [file peerj-06-5112-s001.xlsx]

## Sheet: Sheet1
	Discharge Vlume of Wastewater (10000 tons)
	MT	MTWA	MCF	TI
2001	128974	3724	59695	192393
2002	132208	4392	53954	190554
2003	141264	5266	48847	195377
2004	153875	11395	47467	212737
2005	172232	9185	48516	229933
2006	197934	13685	49543	261162
2007	225169	14494	48957	288620
2008	230362	15244	48087	293693
2009	239116	14728	43855	297699
2010	245470	12039	42371	299880
2011	240802	19878	41428	302108
2012	237252	17069	35308	289629
2013	202896	17129	35018	255043
2014	196145	17777	39846	253768
	Discharge Volume of COD (ton)
	MT	MTWA	MCF	TI
2001	243993	5284.2	156127	405404
2002	264578	6938.7	109610	381127
2003	245144	8313.2	105532	358990
2004	302574	14873.3	90291.5	407739
2005	298628	21297.6	104171	424097
2006	315452	17482.7	114721	447656
2007	344903	18007.6	98339.5	461250
2008	314339	15613.5	104061	434014
2009	313087	17078	121783	451948
2010	300608	13188.8	125048	438845
2011	292227	18387.4	150748	461362
2012	277437	15931	146941	440309
2013	254180	17464.5	157202	428846
2014	239410	18894.4	139272	397577
	Output value (100 million yuan)
	MT	MTWA	MCF	TI
2001	2141.49	213.422	725.404	3080.32
2002	2178.58	256.87	864.999	3300.44
2003	2442.53	295.962	814.636	3553.13
2004	2947.34	327.782	941.426	4216.54
2005	3659.15	369.548	1151.93	5180.63
2006	4538.43	654.292	1368.05	6560.77
2007	5027.12	651.842	2118.49	7797.45
2008	8021.17	700.782	2251.48	10973.4
2009	8778.86	804.548	2089.77	11673.2
2010	9500.85	720.514	2898.93	13120.3
2011	11811.3	993.104	3647.68	16452.1
2012	11417.4	1096.3	3430.2	15943.9
2013	11999.5	1166.56	3550.17	16716.3
2014	11659.1	1303.3	3879.4	16841.8
